# Supplementary material for: Effect of ecological restoration on carbon storage of damaged mountain slope in China’s East Ussuri River Basin
Source: PeerJ. 2025 Aug 8;13:e19854. doi: 10.7717/peerj.19854 (PMC12338060; doi:10.7717/peerj.19854)
Supplement: Supplemental Information 1 [file peerj-13-19854-s001.xlsx]

## Sheet: soil
Type	Site	BD(g/cm3)	SWC(V/V%)	N(g/kg)	P(g/kg)	K(g/kg)
Aggregate spraying repair for Slope 1	S1	0.586	30.5119	1.554	0.72	19.32
	S1	0.571	33.9405	1.227	0.59	19.64
	S1	0.613	24.7635	1.379	0.99	18.97
Aggregate spraying repair for Slope 2	S2	0.52	39.6154	1.621	1.05	17.25
	S2	0.543	33.7017	1.937	1.07	17.65
	S2	0.557	30.3411	1.694	0.96	17.62
Aggregate spraying repair for Slope 3	S3	0.524	32.1183	1.854	0.84	19.37
	S3	0.501	38.1836	1.645	0.92	19.07
	S3	0.505	37.0891	1.832	0.9	19.21
Natural recovery of slope1	S4	0.748	28.785	0.418	0.5052	14.212
	S4	0.745	30.12	0.436	0.50514	14.5612
	S4	0.775	29.8	0.421	0.50628	14.599
Natural recovery of slope2	S5	0.687	29.14	0.495	0.6262	14.4256
	S5	0.709	27.12	0.463	0.6208	14.4451
	S5	0.704	28.27	0.476	0.6184	14.7662
Natural recovery of slope3	S6	0.789	30.14	0.558	0.5164	13.3214
	S6	0.812	29.17	0.592	0.5146	13.3451
	S6	0.794	27.94	0.611	0.5125	13.4015
Undamaged slope1	S7	0.712	27.14	0.953	0.582	15.7
	S7	0.714	28.01	0.928	0.58	15.62
	S7	0.736	29.15	0.93	0.593	15.81
Undamaged slope2	S8	0.725	33.58	0.874	0.61	15.63
	S8	0.707	31.58	0.893	0.592	15.89
	S8	0.713	31.68	0.888	0.607	16.12
Undamaged slope3	S9	0.689	27.88	0.927	0.59	15.72
	S9	0.712	28.41	0.904	0.584	15.71
	S9	0.713	29.75	0.905	0.602	15.79
Note:BD, soil bulk density; SWC, soil water content; N, soil total nitrogen content; P, soil total phosphorous content; K, soil total potassium content

## Sheet: carbon
	Tree Layer	Shrub Layer	Litter Layer	Root	Soil	Herbaceous Layer
Type	Carbon content (kg/m2)	Carbon content (kg/m2)	Carbon content (kg/m2)	Carbon content (kg/m2)	Carbon content (kg/m2)	Carbon content (kg/m2)	C(kg/m2)
Aggregate spraying repair for Slope 1	1.5792	0.0172	0.0071	0.5241	2.678	0.0034	4.809
Aggregate spraying repair for Slope 2	1.5278	0.0275	0.0043	0.4776	4.5368	0.0028	6.5768
Aggregate spraying repair for Slope 3	1.4764	0.0039	0.0056	0.4171	4.5677	0.0036	6.4743
Natural recovery of slope1	0	0.007	0.0012	0.00182	1.124	0.0014	1.13542
Natural recovery of slope2	0	0.009	0.0022	0.00234	1.146	0.0015	1.16104
Natural recovery of slope3	0	0.006	0.0009	0.00156	1.117	0.0022	1.12766
Undamaged slope1	1.5862	0.014	0.0138	0.442	8.588	0.0024	10.6464
Undamaged slope2	1.5879	0.012	0.0146	0.456	8.564	0.0015	10.636
Undamaged slope3	1.5853	0.013	0.0131	0.447	8.586	0.0027	10.6471

## Sheet: plants_community
	Tree Layer		Shrub Layer	Herbaceous Layer	tree Layer and shrub Layer Density
Type	Density(plants/m2)	Diameter of breast height(cm)	Density(plants/m2)	Density(plants/m2)	De(plants/m2)
Aggregate spraying repair for Slope 1	0.45	5.84	0.34	4.5	0.79
Aggregate spraying repair for Slope 2	0.5	5.49	0.34	3.6	0.84
Aggregate spraying repair for Slope 3	0.55	5.14	0.39	4.9	0.94
Natural recovery of slope1	0	0	0.08	1.6	0.08
Natural recovery of slope2	0	0	0.07	2.4	0.07
Natural recovery of slope3	0	0	0.09	2.8	0.09
Undamaged slope1	0.054	15	0.15	3.1	0.204
Undamaged slope2	0.049	15.2	0.14	3.2	0.189
Undamaged slope3	0.048	14.8	0.16	3.5	0.208
